# Supplementary material
Source: PubMed Central journal article supplement (PMC6399600)

Figure 1C

Left panel / Multi-tissue RT-PCR

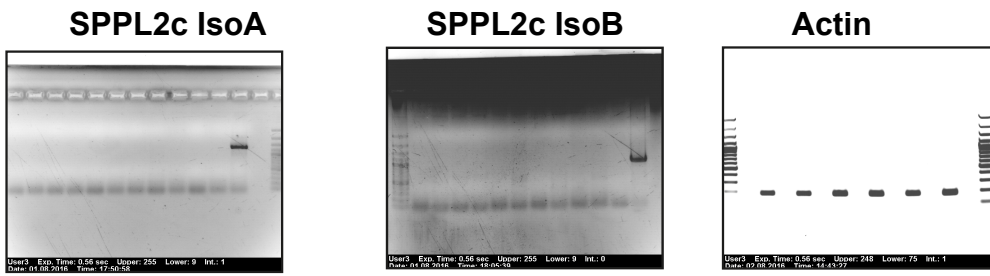

Middle panel / Muscle RT-PCR

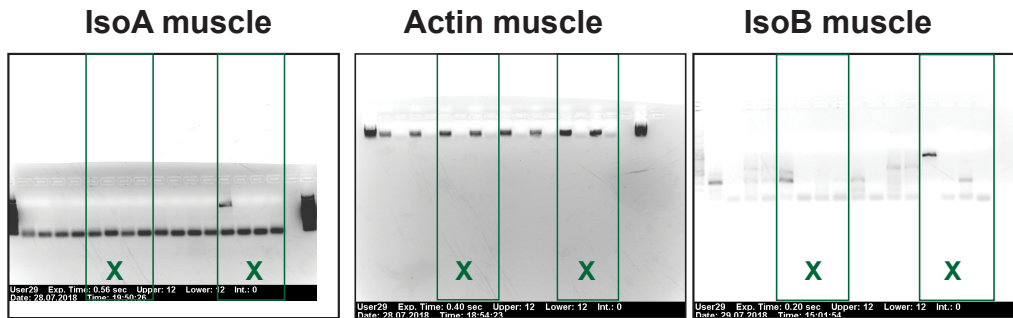

Right panel / Heart RT-PCR

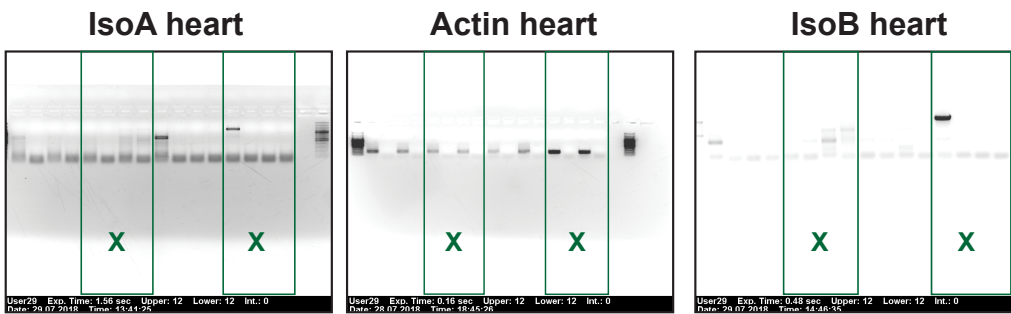

Figure 1D

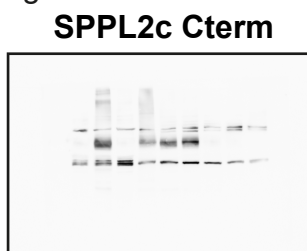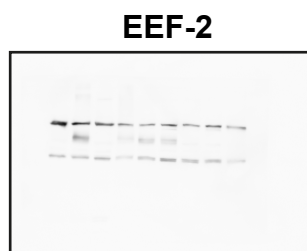

Figure 1E

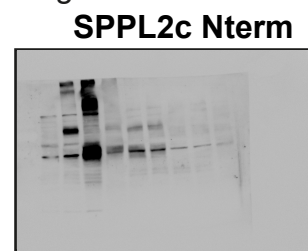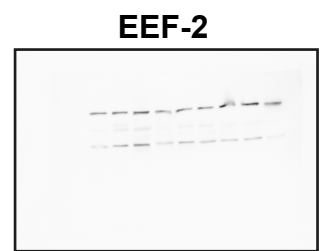

Figure 1G left panel

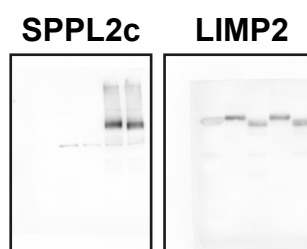

Figure 1G right panel

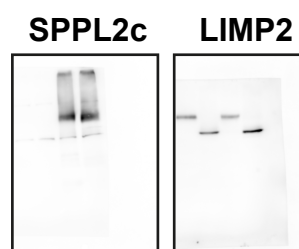

Figure 1H left panel

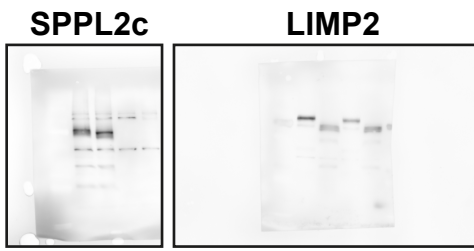

Figure 1H right panel

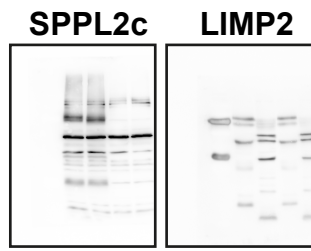

Figure 1I

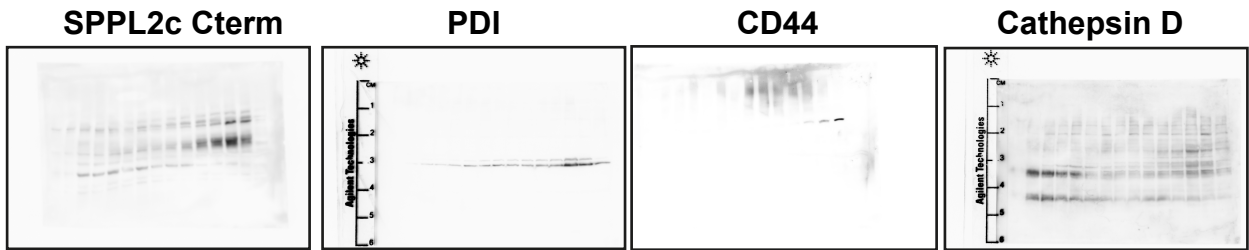

Supplement: EMBR-20-e46449-s003.pdf [file EMBR-20-e46449-s003.pdf]
