# Supplementary material
Source: PubMed Central journal article supplement (PMC6399600)

Figure 2A

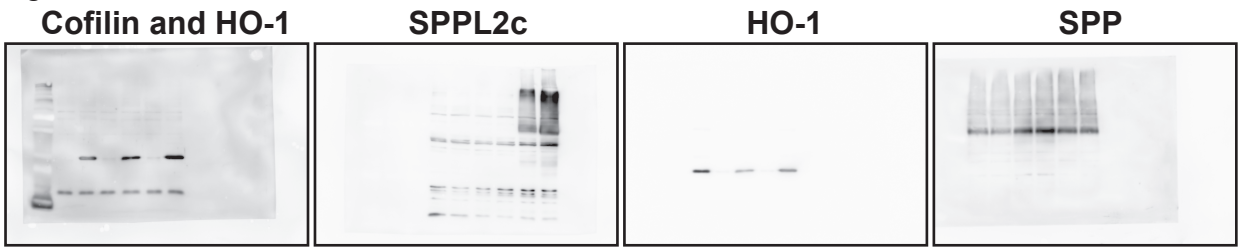

Figure 2C

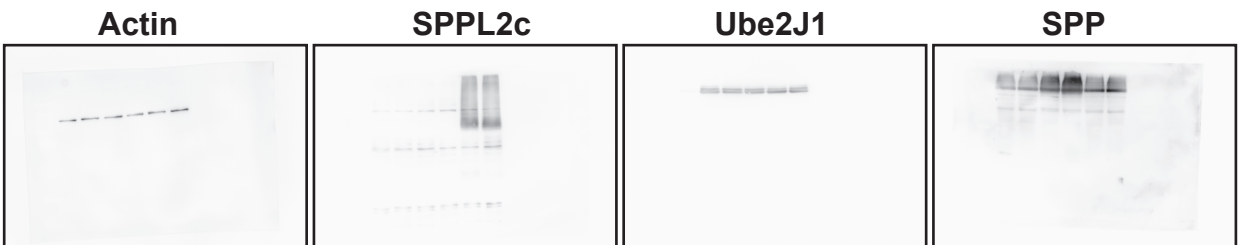

Figure 2D

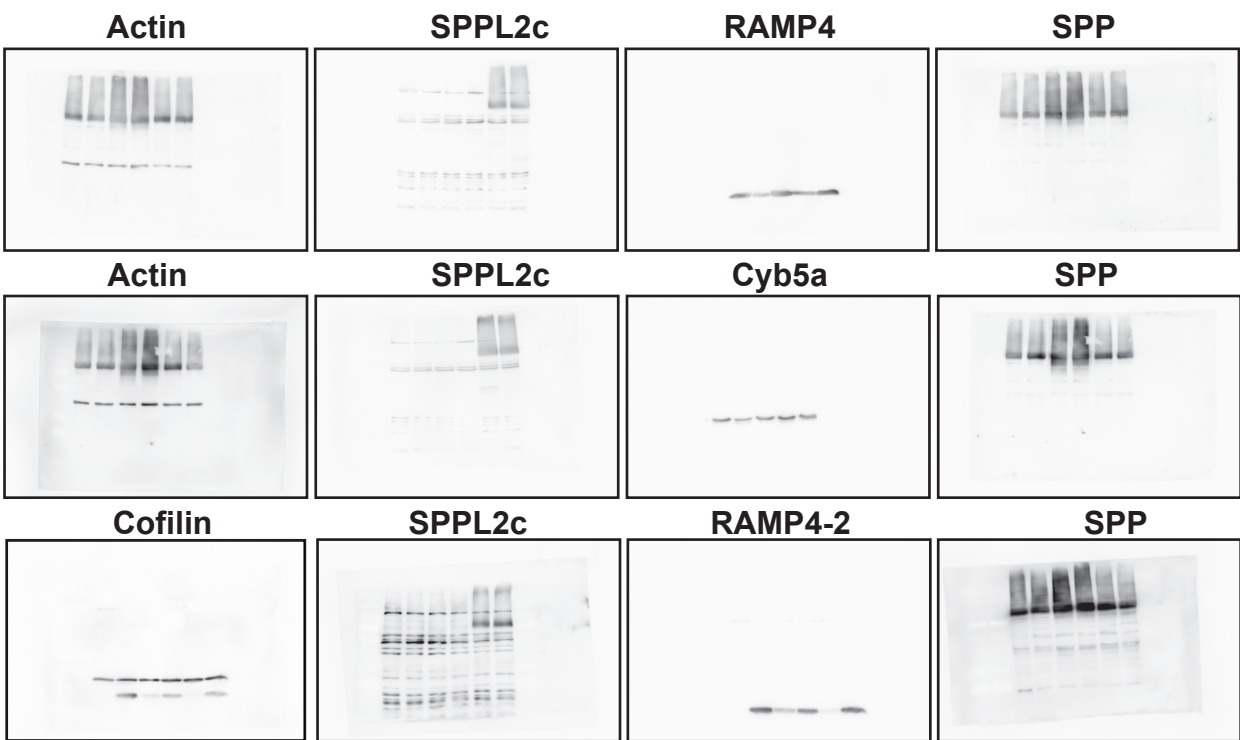

Figure 2E

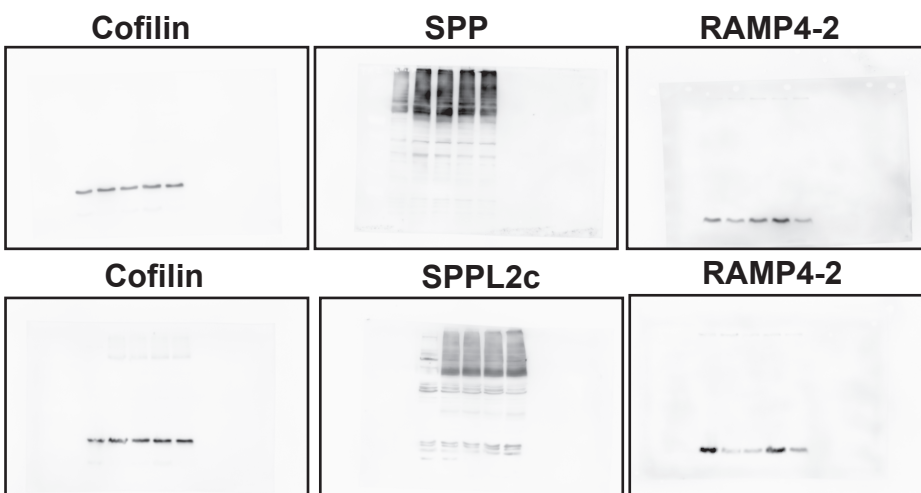

Figure 2F

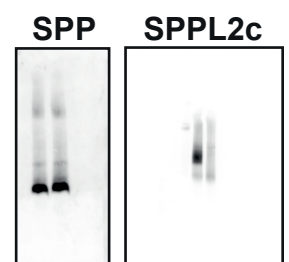

Supplement: EMBR-20-e46449-s004.pdf [file EMBR-20-e46449-s004.pdf]

Figure 3B

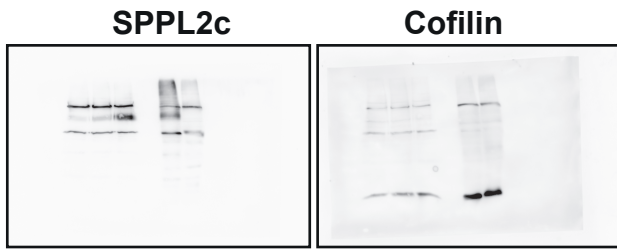

Figure 3D

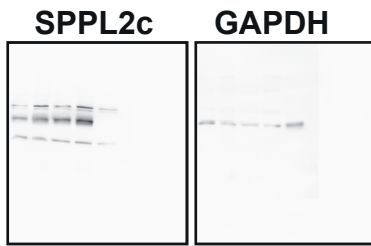

Figure 3H

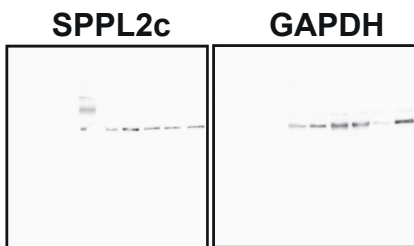

Supplement: EMBR-20-e46449-s005.pdf [file EMBR-20-e46449-s005.pdf]

Figure 4D

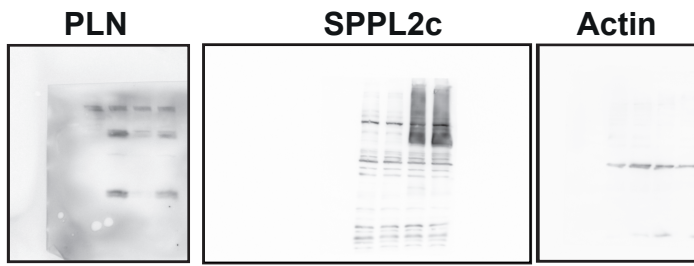

Figure 4E

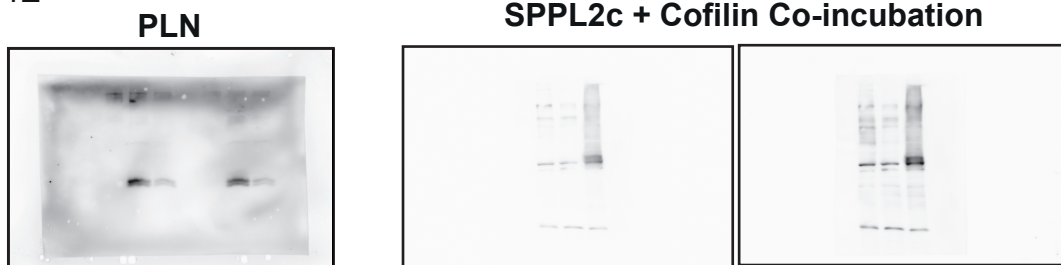

Figure 4H

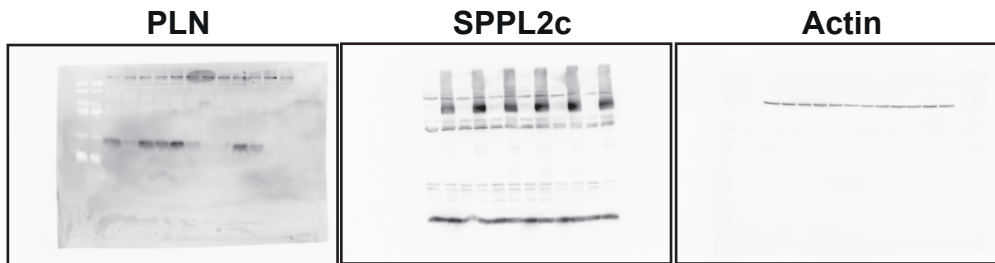

Supplement: EMBR-20-e46449-s006.pdf [file EMBR-20-e46449-s006.pdf]

Figure 5A

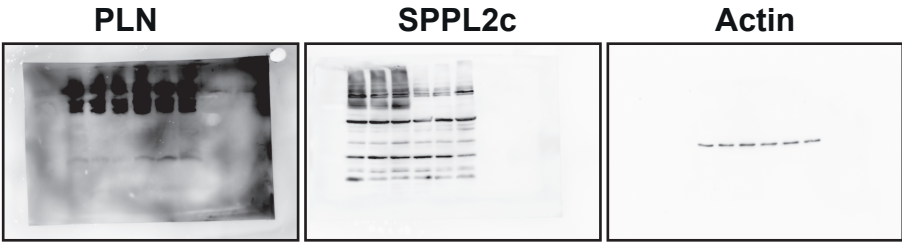

Figure 5H

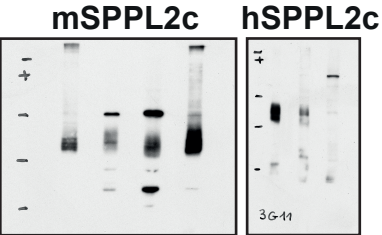

Supplement: EMBR-20-e46449-s007.pdf [file EMBR-20-e46449-s007.pdf]
